# Supplementary material for: Structure of ATP synthase from ESKAPE pathogen Acinetobacter baumannii
Source: PubMed Central journal article supplement (PMC8849298; doi:10.1126/sciadv.abl5966), 2022-02-16
Supplement: sciadv.abl5966_sm.pdf [file sciadv.abl5966_sm.pdf]

Supplementary Materials for  
**Structure of ATP synthase from ESKAPE pathogen *Acinetobacter baumannii***

Julius K. Demmer, Ben P. Phillips, O. Lisa Uhrig, Alain Filloux, Luke P. Allsopp,  
Maike Bublitz, Thomas Meier\*

\*Corresponding author. Email: [t.meier@imperial.ac.uk](mailto:t.meier@imperial.ac.uk)

Published 16 February 2022, *Sci. Adv.* **8**, eabl5966 (2022)  
DOI: [10.1126/sciadv.abl5966](https://doi.org/10.1126/sciadv.abl5966)

**This PDF file includes:**

Figs. S1 to S6  
Table S1  
References

## SUPPLEMENTARY FIGURES

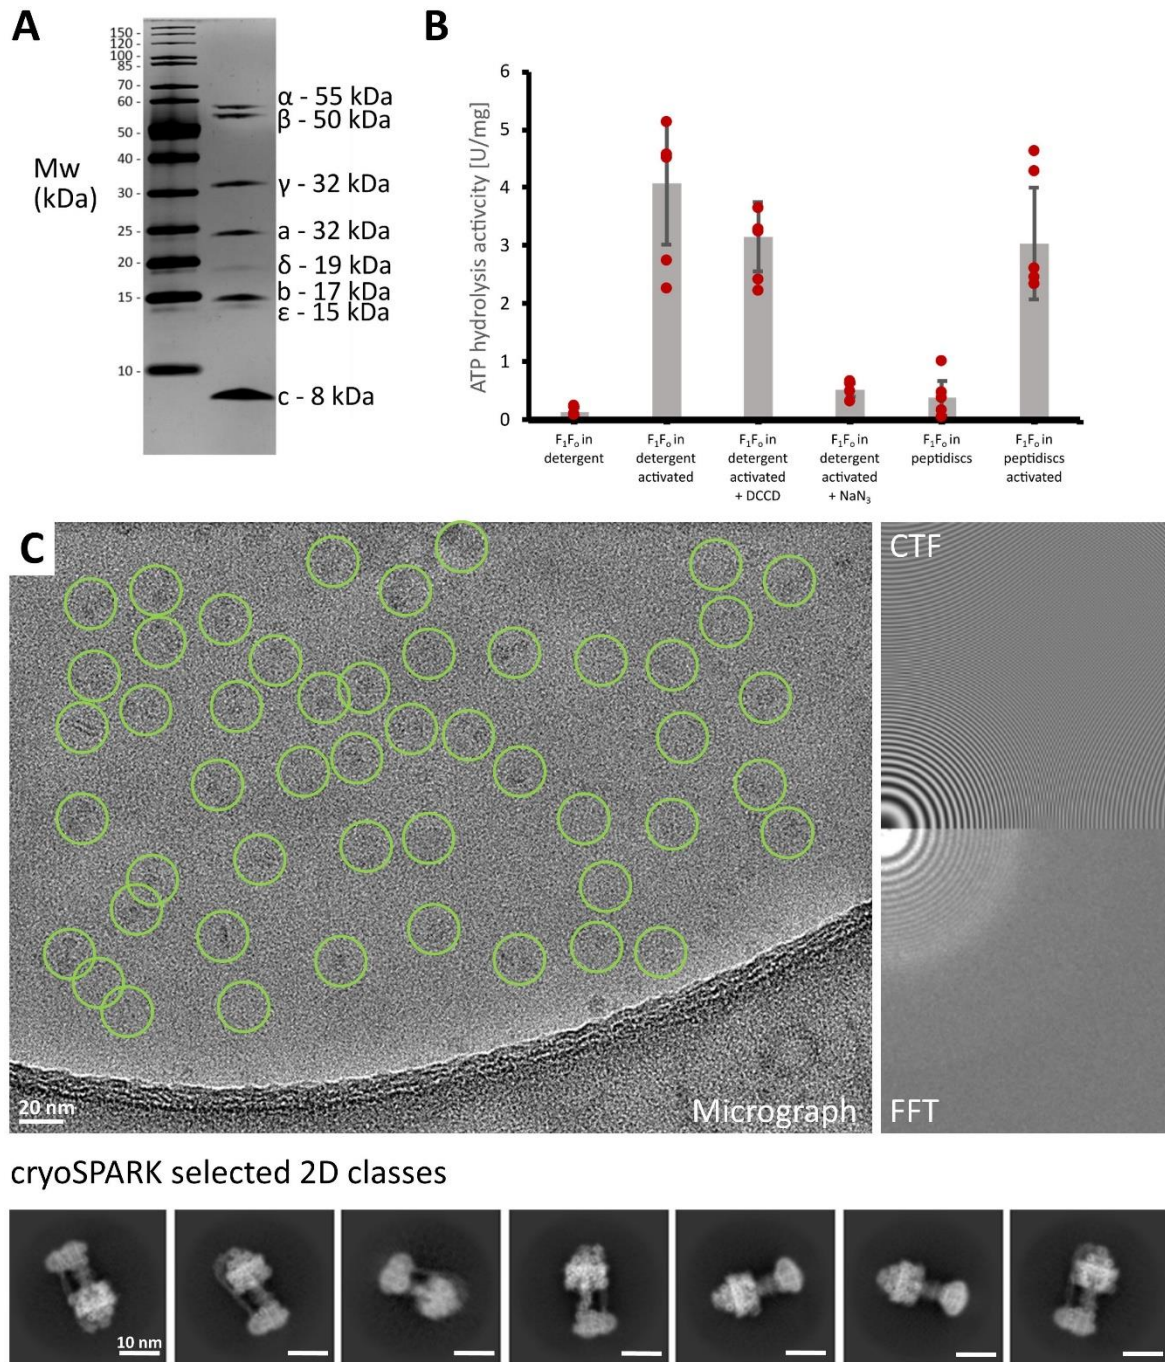

**Figure S1 – Purification, biochemical characterisation, and sample quality of the *A. baumannii* ATP synthase.** **A:** Detergent-solubilised ATP synthase on SDS-PAGE (stained with silver). **B:** ATPase hydrolytic activity in the presence of activators (detergent) and inhibitors (DCCD and  $\text{NaN}_3$ ). The ATPase enzyme activity of the purified complex was blocked both in 4-trans-(4-trans-propylcyclohexyl)-cyclohexyl  $\alpha$ -maltoside (tPCC- $\alpha$ -M) and peptidiscs but could be restored by addition of lauryl-dimethyl-amine oxide (LDAO) and trypsin to a specific activity of  $\sim 4$  U/mg in tPCC- $\alpha$ -M and  $\sim 3$  U/mg in peptidiscs (labelled activated on x-axis). In this activated form, the sample could not be inhibited by the  $F_0$  c-ring inhibitor *N,N'*-dicyclohexylcarbodiimide (DCCD) but still showed full inhibition by  $\text{NaN}_3$ , which binds the  $\beta$ -subunit nucleotide binding sites, indicating that  $F_1$  is uncoupled from  $F_0$  upon enzyme activation by LDAO/trypsin. **C:** Representative micrograph showing picked particles (green circles), CTF estimation, FFT of raw image and selected 2D classes of *A. baumannii* ATP synthase processed in CryoSPARC version 2.15.

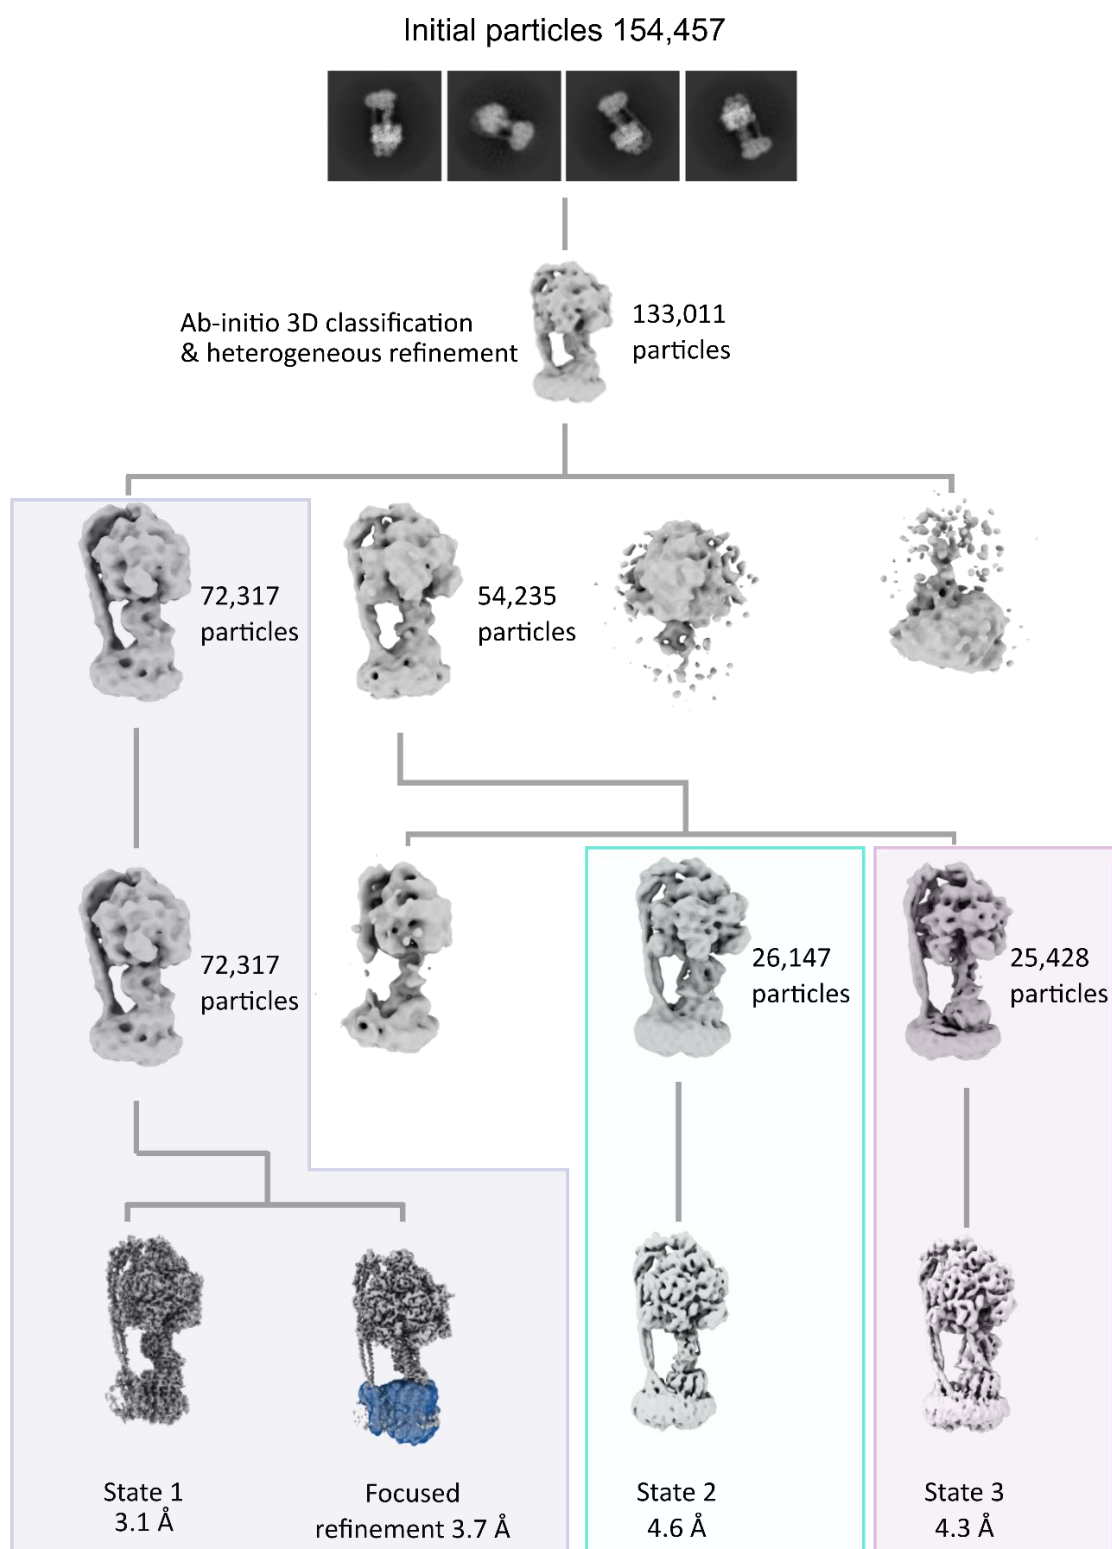

**Figure S2 – Flowchart for cryo-EM data processing.** Particles were subjected to multiple rounds of picking and refinement as indicated. Different rotational states were separated by 3D classification, with each class selected for further processing to high resolution as shown. Once final particles had been selected final rounds of polishing, non-uniform refinement and post-processing resulted in 3 maps with global resolution ranges of 3.1 Å – 4.6 Å. Further focused refinement of the membrane-embedded  $F_0$  region in the state 1 map (blue) improved the resolution to 3.7 Å for this region (**Fig. S3C**). All processing was conducted in CryoSPARC 2.15.

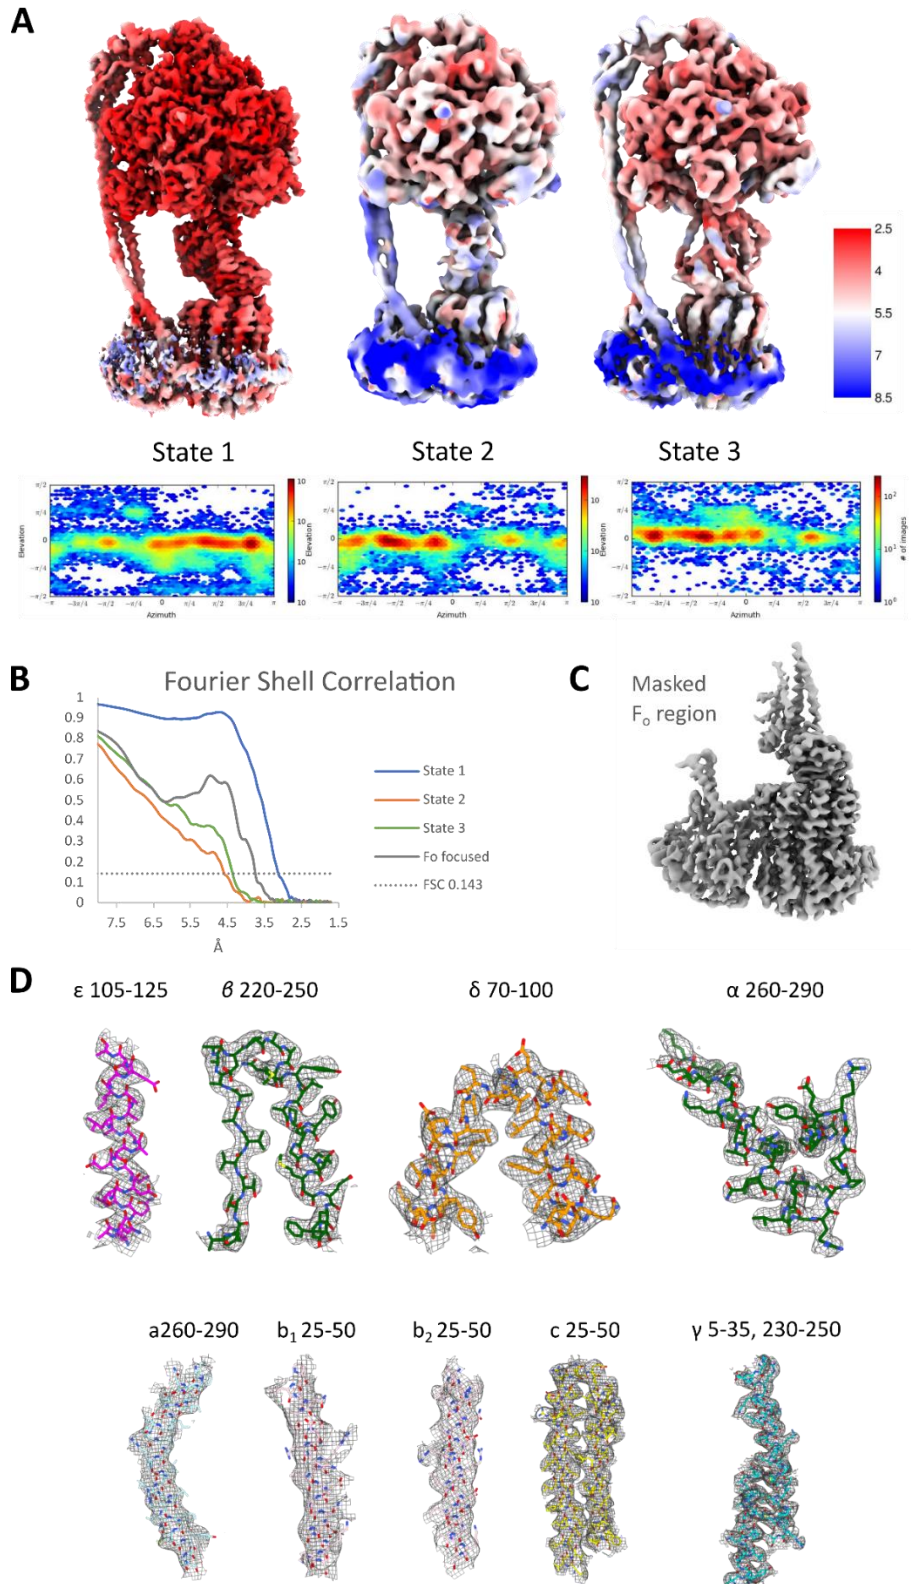

**Figure S3 – Quality of EM maps of *A. baumannii* ATP synthase.** **A:** Maps of 3 rotational states of ATP synthase coloured according to local resolution (red = high, blue=low). Below each map is the corresponding Euler angle plot (CryoSPARC version 2.15) indicating angular distribution of views observed in 3D reconstruction. **B:** Fourier Shell Correlation (FSC) curves for 4 EM maps as labelled. **C:** Density map of  $F_o$  region following masked refinements to improve local resolution to  $\sim 3.7$  Å resolution. **D:** Details of map features of state 1 in different subunits with examples of atomic models built in the *cryo*-EM maps (displayed amino acid sequences are indicated).



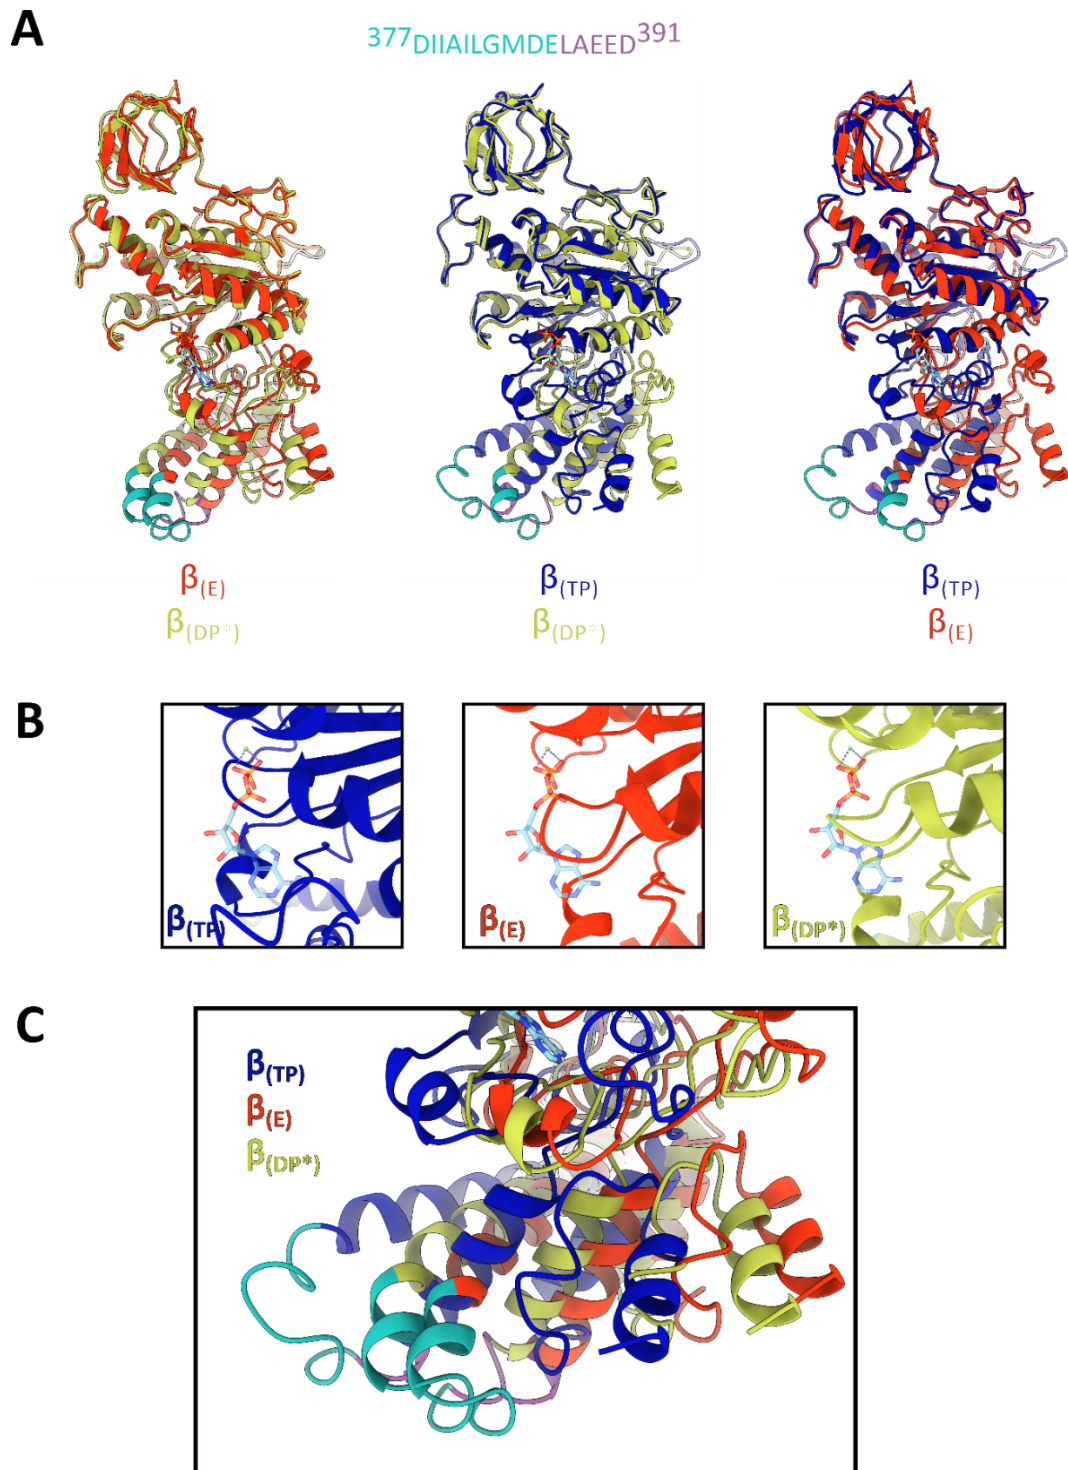

**Figure S4 – Conformational changes in the catalytic  $\beta$  subunits of *A. baumannii* ATP synthase. A:** Structural alignments of  $\beta_{TP}$  (blue),  $\beta_{DP^*}$  (yellow) and  $\beta_E$  (red) demonstrate conformational transitions during the ATP synthase catalytic cycle. ADP is shown in stick representation in its binding location in  $\beta_{TP}$  in all 3 alignments for reference only. **B:** Close up of nucleotide binding pockets for all 3 states with ADP as observed in  $\beta_{TP}$  shown in cyan (nitrogen = dark blue, oxygen = red, phosphorous = orange). Steric clashes between the peptide backbone and the ADP in  $\beta_E$  and  $\beta_{DP^*}$  clearly indicate incompatibility with ATP binding. **C:** Close-up of conformational changes in the  $\epsilon$ -proximal helix-turn-helix motif in the  $\beta$ -subunit (<sup>377</sup>DIAILGMDE<sup>386</sup> – shown in cyan) which prevent bidirectional rotation of the central stalk when in the  $\beta_{TP}$  conformation, but not in the  $\beta_E$  or  $\beta_{DP^*}$  conformations. The state 1 structure (PDB: 7P2Y) was used to generate this figure. All alignments were performed in UCSF ChimeraX.

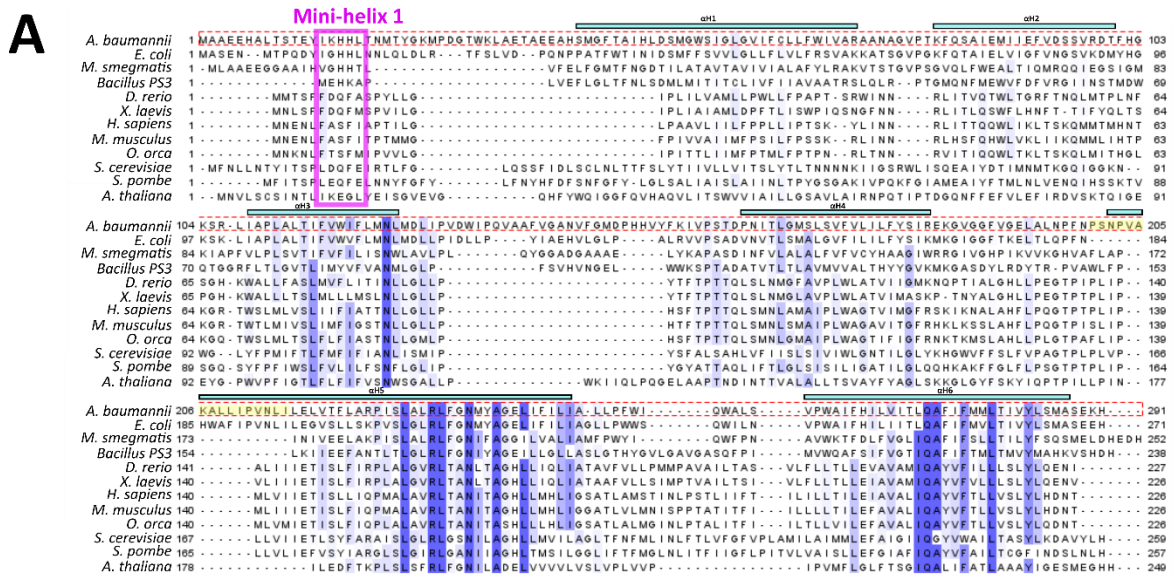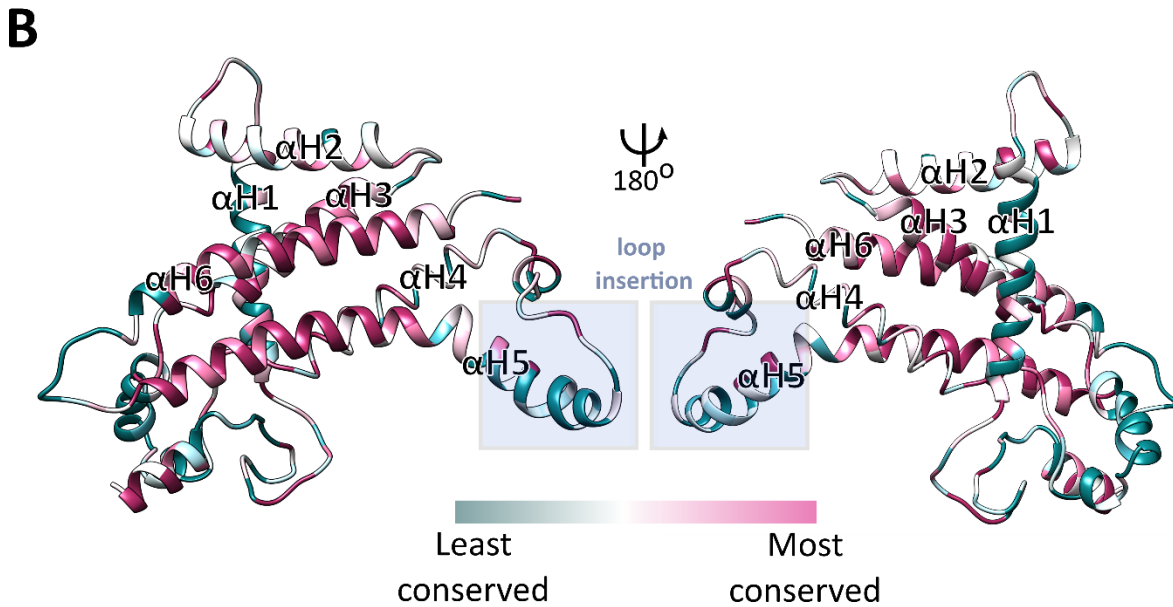

**Figure S5 – Amino acid alignment and residue conservation analysis of subunit a of the *A. baumannii* ATP synthase. A:** Multiple sequence alignment (produced using ClustalX2 and Jalview) of the a-subunit of the ATP synthase from model organisms with residues coloured by percentage identity across species (white = non conserved, blue = conserved, red dashed box = *A. baumannii* sequence). Purple box indicates residues coloured purple in **Figure 2B** which form mini-helix 1 in *A. baumannii* and *B. taurus*. The locations of the a-subunit helices (aH1 to aH6) are indicated above the alignment. Yellow highlight indicates *A. baumannii* loop insertion between aH4 and aH5. **B:** Cartoon representation of the *A. baumannii* a-subunit coloured according to conservation (bottom) from least conserved (turquoise) to most conserved (pink), generated using the CONSURF server (40). The core parts of helices aH5 and aH6 are the highest conserved regions in the a-subunit. Blue box indicates location of a-subunit loop insertion.

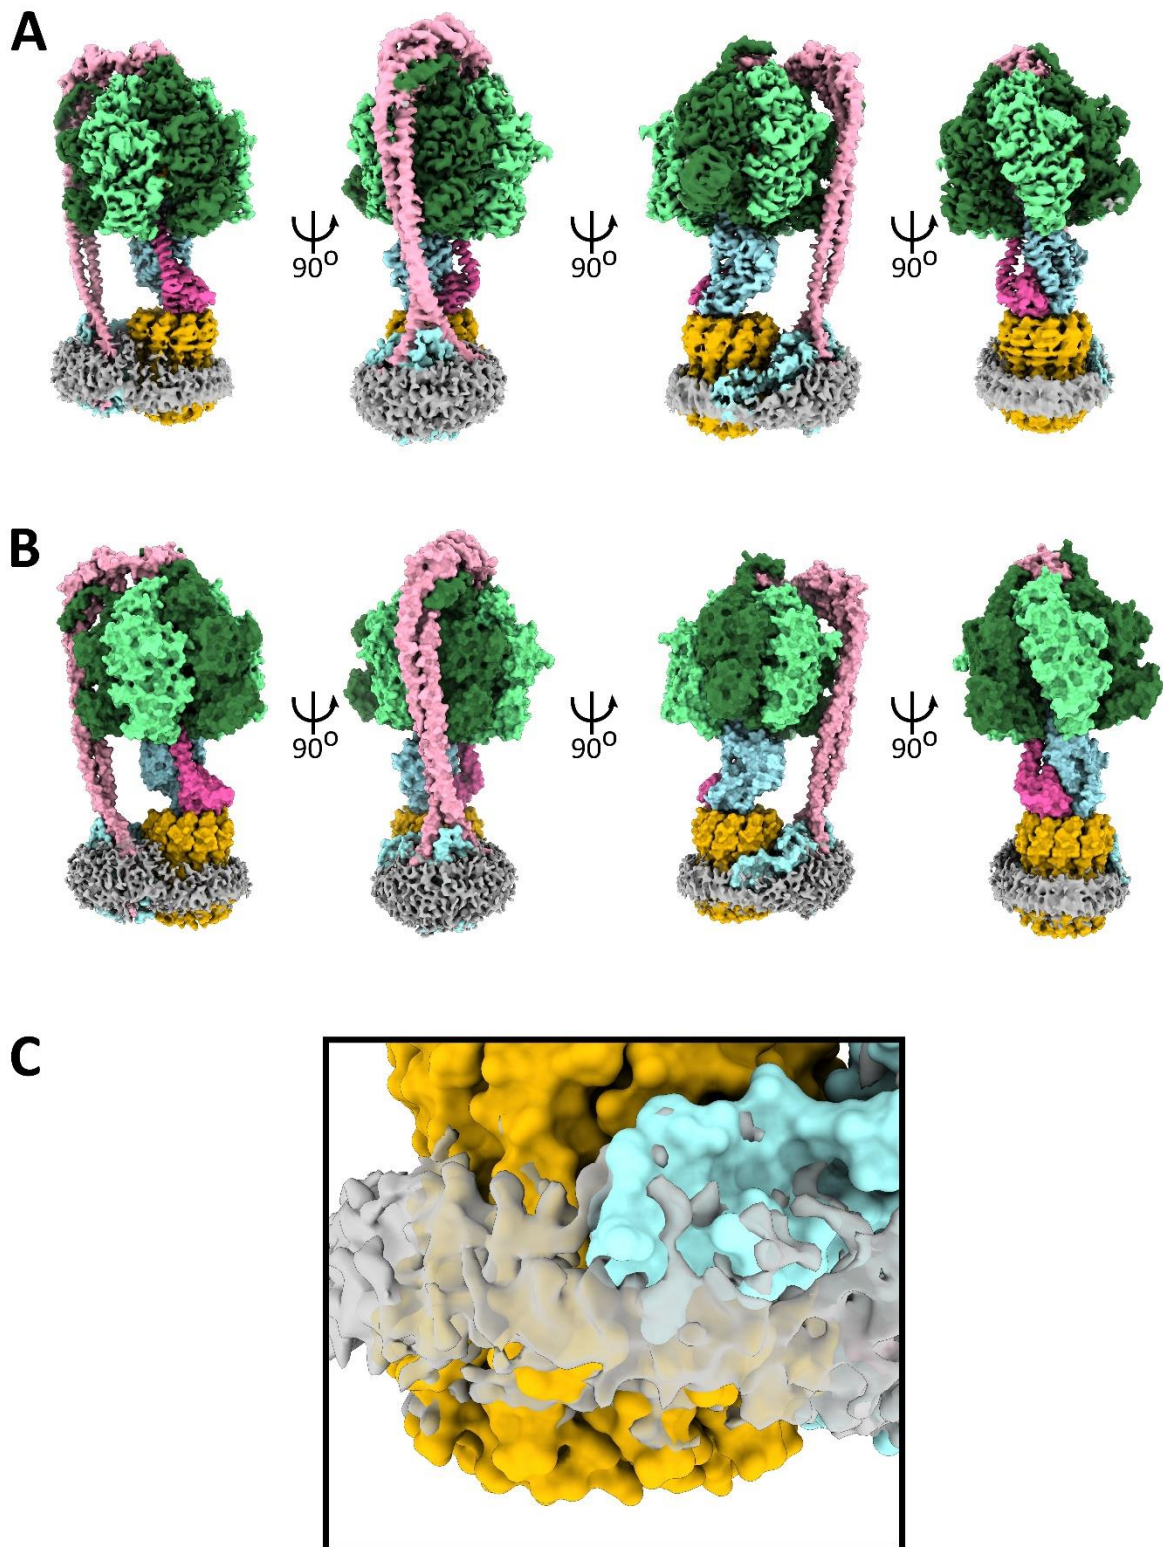

**Figure S6 – Peptidisc boundaries of the *A. baumannii* ATP synthase.** **A:** Rotated side views of the *cryo*-EM map for *A. baumannii* in peptidisc (state 1), coloured by proximity to main chain in same colour scheme as **Figure 1A**. Map was coloured using UCSF ChimeraX with a ‘zone’ radius of 5 Å. Note that the peptidisc map is more than 5 Å away from the peptide backbone apart from at the a-subunit loop extension near the periplasmic membrane envelope (view third in from the left). **B:** Surface representation of the *A. baumannii* atomic coordinates file, coloured in correspondence to experimental density in panel (A) with *cryo*-EM map for the peptidisc superimposed (grey density). **C:** Close up view of a surface representation (as seen in panel B, third position) of the a-subunit loop insertion superimposed with the peptidisc *cryo*-EM map.

**Table S1 - Cryo-EM model building and statistics**

|                                                   | State 1                                                        | State 2                                                        | State 3                                                        |
|---------------------------------------------------|----------------------------------------------------------------|----------------------------------------------------------------|----------------------------------------------------------------|
| <b>Data collection</b>                            |                                                                |                                                                |                                                                |
| Accession numbers                                 | 7P2Y                                                           | 7P3N                                                           | 7P3W                                                           |
|                                                   | EMD-13174                                                      | EMD-13181                                                      | EMD-13186                                                      |
| Electron microscope                               | Titan Krios G3                                                 | Titan Krios G3                                                 | Titan Krios G3                                                 |
| Electron detector                                 | Gatan K3                                                       | Gatan K3                                                       | Gatan K3                                                       |
| Nominal Magnification                             | 85,000                                                         | 85,000                                                         | 85,000                                                         |
| Voltage (kV)                                      | 300                                                            | 300                                                            | 300                                                            |
| Defocus range ( $\mu\text{m}$ )                   | -1.5 - 3                                                       | -1.5 - 3                                                       | -1.5 - 3                                                       |
| Pixel size ( $\text{\AA}$ )                       | 0.85                                                           | 0.85                                                           | 0.85                                                           |
| Total Dose ( $\text{e}^-/\text{\AA}^2$ )          | 60                                                             | 60                                                             | 60                                                             |
| Symmetry imposed                                  | C1                                                             | C1                                                             | C1                                                             |
| Total micrographs                                 | 11,490                                                         | 11,490                                                         | 11,490                                                         |
| Initial particle images (no.)                     | 349,160                                                        | 349,160                                                        | 349,160                                                        |
| Final particle images (no.)                       | 72,317                                                         | 26,147                                                         | 25,428                                                         |
| Map resolution ( $\text{\AA}$ )                   | 3.1                                                            | 4.6                                                            | 4.3                                                            |
| FSC threshold                                     |                                                                | 0.143                                                          |                                                                |
| Map resolution range ( $\text{\AA}$ )             | 2.6-8.5                                                        | 3.9-8.5                                                        | 3.5-8.5                                                        |
| Map sharpening <i>B</i> factor ( $\text{\AA}^2$ ) | -60                                                            | -102                                                           | -74                                                            |
| <b>Image processing</b>                           |                                                                |                                                                |                                                                |
| Initial model                                     | <i>De novo</i>                                                 | <i>De novo</i>                                                 | <i>De novo</i>                                                 |
| Model composition                                 |                                                                |                                                                |                                                                |
| Protein chains                                    | 22                                                             | 22                                                             | 22                                                             |
| Non hydrogen atoms                                | 37183                                                          | 37126                                                          | 37161                                                          |
| Protein residues                                  | 4904                                                           | 4904                                                           | 4904                                                           |
| Ligands                                           | 3 Mg-ATP<br>1 Mg-ADP<br>1 P <sub>i</sub><br>3 H <sub>2</sub> O | 3 Mg-ATP<br>1 Mg-ADP<br>1 P <sub>i</sub><br>3 H <sub>2</sub> O | 3 Mg-ATP<br>1 Mg-ADP<br>1 P <sub>i</sub><br>3 H <sub>2</sub> O |
| R.m.s. deviations                                 |                                                                |                                                                |                                                                |
| Bond lengths ( $\text{\AA}$ )                     | 0.004                                                          | 0.005                                                          | 0.005                                                          |
| Bond angles ( $^\circ$ )                          | 0.716                                                          | 0.861                                                          | 0.838                                                          |
| Ramachandran plot                                 |                                                                |                                                                |                                                                |
| Favoured (%)                                      | 96.2                                                           | 92.5                                                           | 93.7                                                           |
| Disallowed (%)                                    | 0                                                              | 0.06                                                           | 0.02                                                           |
| Validation                                        |                                                                |                                                                |                                                                |
| Rotamer outliers (%)                              | 0.08                                                           | 0.21                                                           | 0.13                                                           |
| MolProbity Clashscore                             | 10.37                                                          | 30.55                                                          | 26.71                                                          |



## REFERENCES AND NOTES

1. M. S. Mulani, E. E. Kamble, S. N. Kumkar, M. S. Tawre, K. R. Pardesi, Emerging strategies to combat ESKAPE pathogens in the era of antimicrobial resistance: A review. *Front. Microbiol.* **10**, 539 (2019).
2. E. M. Duran-Manuel, C. Cruz-Cruz, G. Ibanez-Cervantes, J. C. Bravata-Alcantara, O. Sosa-Hernandez, L. Delgado-Balbuena, G. Leon-Garcia, I. A. Cortes-Ortiz, M. A. Cureno-Diaz, G. Castro-Escarpulli, J. M. Velez-Resendiz, J. M. Bello-Lopez, Clonal dispersion of *Acinetobacter baumannii* in an intensive care unit designed to patients COVID-19. *J. Infect. Dev. Ctries.* **15**, 58–68 (2021).
3. E. Tacconelli, E. Carrara, A. Savoldi, S. Harbarth, M. Mendelson, D. L. Monnet, C. Pulcini, G. Kahlmeter, J. Kluytmans, Y. Carmeli, M. Ouellette, K. Outterson, J. Patel, M. Cavaleri, E. M. Cox, C. R. Houchens, M. L. Grayson, P. Hansen, N. Singh, U. Theuretzbacher, N. Magrini; WHO Pathogens Priority List Working Group, Discovery, research, and development of new antibiotics: The WHO priority list of antibiotic-resistant bacteria and tuberculosis. *Lancet Infect. Dis.* **18**, 318–327 (2018).
4. S. Khoshnood, M. Goudarzi, E. Taki, A. Darbandi, E. Kouhsari, M. Heidary, M. Motahar, M. Moradi, H. Bazayr, Bedaquiline: Current status and future perspectives. *J. Glob. Antimicrob. Resist.* **25**, 48–59 (2021).
5. A. Siroy, P. Cosette, D. Seyer, C. Lemaitre-Guillier, D. Vallenet, A. Van Dorsselaer, S. Boyer-Mariotte, T. Jouenne, E. De, Global comparison of the membrane subproteomes between a multidrug-resistant *Acinetobacter baumannii* strain and a reference strain. *J. Proteome Res.* **5**, 3385–3398 (2006).
6. V. Tiwari, J. Vashist, A. Kapil, R. R. Moganty, Comparative proteomics of inner membrane fraction from carbapenem-resistant *Acinetobacter baumannii* with a reference strain. *PLOS ONE* **7**, e39451 (2012).

7. T. C. Umland, L. W. Schultz, U. MacDonald, J. M. Beanan, R. Olson, T. A. Russo, In vivo–validated essential genes identified in *Acinetobacter baumannii* by using human ascites overlap poorly with essential genes detected on laboratory media. *MBio* **3**, e00113-12 (2012).
8. N. Wang, E. A. Ozer, M. J. Mandel, A. R. Hauser, Genome-wide identification of *Acinetobacter baumannii* genes necessary for persistence in the lung. *MBio* **5**, e01163-14 (2014).
9. M. Sobti, C. Smits, A. S. Wong, R. Ishmukhametov, D. Stock, S. Sandin, A. G. Stewart, Cryo-EM structures of the autoinhibited *E. coli* ATP synthase in three rotational states. *eLife* **5**, e21598 (2016).
10. H. Guo, T. Suzuki, J. L. Rubinstein, Structure of a bacterial ATP synthase. *eLife* **8**, e43128 (2019).
11. M. Sobti, R. Ishmukhametov, J. C. Bouwer, A. Ayer, C. Suarna, N. J. Smith, M. Christie, R. Stocker, T. M. Duncan, A. G. Stewart, Cryo-EM reveals distinct conformations of *E. coli* ATP synthase on exposure to ATP. *eLife* **8**, e43864 (2019).
12. A. Hahn, J. Vonck, D. J. Mills, T. Meier, W. Kühlbrandt, Structure, mechanism, and regulation of the chloroplast ATP synthase. *Science* **360**, eaat4318 (2018).
13. J. P. Abrahams, A. G. W. Leslie, R. Lutter, J. E. Walker, Structure at 2.8 Å resolution of F<sub>1</sub>-ATPase from bovine heart mitochondria. *Nature* **370**, 621–628 (1994).
14. P. D. Boyer, The ATP synthase—A splendid molecular machine. *Annu. Rev. Biochem.* **66**, 717–749 (1997).
15. N. B. Shah, T. M. Duncan, Aerobic growth of *Escherichia coli* is reduced, and ATP synthesis is selectively inhibited when five C-terminal residues are deleted from the  $\epsilon$  subunit of ATP synthase. *J. Biol. Chem.* **290**, 21032–21041 (2015).

16. H. Guo, G. M. Courbon, S. A. Bueler, J. Mai, J. Liu, J. L. Rubinstein, Structure of mycobacterial ATP synthase bound to the tuberculosis drug bedaquiline. *Nature* **589**, 143–147 (2021).
17. C. von Ballmoos, J. Brunner, P. Dimroth, The ion channel of F-ATP synthase is the target of toxic organotin compounds. *Proc. Natl. Acad. Sci. U.S.A.* **101**, 11239–11244 (2004).
18. S. Hong, P. L. Pedersen, ATP synthase and the actions of inhibitors utilized to study its roles in human health, disease, and other scientific areas. *Microbiol. Mol. Biol. Rev.* **72**, 590–641 (2008).
19. M. Lamontagne Boulet, C. Isabelle, I. Guay, E. Brouillette, J. P. Langlois, P. E. Jacques, S. Rodrigue, R. Brzezinski, P. B. Beauregard, K. Bouarab, K. Boyapelly, P. L. Boudreault, E. Marsault, F. Malouin, Tomatidine is a lead antibiotic molecule that targets *Staphylococcus aureus* ATP synthase subunit C. *Antimicrob. Agents Chemother.* **62**, e02197-17 (2018).
20. A. J. Martin-Galiano, B. Gorgojo, C. M. Kunin, A. G. de la Campa, Mefloquine and new related compounds target the F<sub>0</sub> complex of the F<sub>0</sub>F<sub>1</sub> H<sup>+</sup>-ATPase of *Streptococcus pneumoniae*. *Antimicrob. Agents Chemother.* **46**, 1680–1687 (2002).
21. W. Balemans, L. Vranckx, N. Lounis, O. Pop, J. Guillemont, K. Vergauwen, S. Mol, R. Gilissen, M. Motte, D. Lancois, M. De Bolle, K. Bonroy, H. Lill, K. Andries, D. Bald, A. Koul, Novel antibiotics targeting respiratory ATP synthesis in Gram-positive pathogenic bacteria. *Antimicrob. Agents Chemother.* **56**, 4131–4139 (2012).
22. M. E. Kovach, P. H. Elzer, D. S. Hill, G. T. Robertson, M. A. Farris, R. M. Roop II, K. M. Peterson, Four new derivatives of the broad-host-range cloning vector pBBR1MCS, carrying different antibiotic-resistance cassettes. *Gene* **166**, 175–176 (1995).
23. M. L. Carlson, J. W. Young, Z. Zhao, L. Fabre, D. Jun, J. Li, J. Li, H. S. Dhupar, I. Wason, A. T. Mills, J. T. Beatty, J. S. Klassen, I. Rouiller, F. Duong, The peptidisc, a simple method for stabilizing membrane proteins in detergent-free solution. *eLife* **7**, e34085 (2018).

24. H. Schägger, G. von Jagow, Tricine-sodium dodecyl sulfate-polyacrylamide gel electrophoresis for the separation of proteins in the range from 1 to 100 kDa. *Anal. Biochem.* **166**, 368–379 (1987).
25. G. M. Cook, S. Keis, H. W. Morgan, C. von Ballmoos, U. Matthey, G. Kaim, P. Dimroth, Purification and biochemical characterization of the F<sub>1</sub>F<sub>0</sub>-ATP synthase from thermoalkaliphilic *Bacillus* sp. strain TA2.A1. *J. Bacteriol.* **185**, 4442–4449 (2003).
26. A. Punjani, J. L. Rubinstein, D. J. Fleet, M. A. Brubaker, cryoSPARC: Algorithms for rapid unsupervised cryo-EM structure determination. *Nat. Methods* **14**, 290–296 (2017).
27. P. B. Rosenthal, R. Henderson, Optimal determination of particle orientation, absolute hand, and contrast loss in single-particle electron cryomicroscopy. *J. Mol. Biol.* **333**, 721–745 (2003).
28. P. Emsley, K. Cowtan, Coot: Model-building tools for molecular graphics. *Acta Crystallogr. D Biol. Crystallogr.* **60**, 2126–2132 (2004).
29. L. A. Kelley, S. Mezulis, C. M. Yates, M. N. Wass, M. J. Sternberg, The Phyre2 web portal for protein modeling, prediction and analysis. *Nat. Protoc.* **10**, 845–858 (2015).
30. R. T. Kidmose, J. Juhl, P. Nissen, T. Boesen, J. L. Karlsen, B. P. Pedersen, Namdinator—Automatic molecular dynamics flexible fitting of structural models into cryo-EM and crystallography experimental maps. *IUCrJ* **6**, 526–531 (2019).
31. P. D. Adams, P. V. Afonine, G. Bunkoczi, V. B. Chen, I. W. Davis, N. Echols, J. J. Headd, L. W. Hung, G. J. Kapral, R. W. Grosse-Kunstleve, A. J. McCoy, N. W. Moriarty, R. Oeffner, R. J. Read, D. C. Richardson, J. S. Richardson, T. C. Terwilliger, P. H. Zwart, PHENIX: A comprehensive Python-based system for macromolecular structure solution. *Acta Crystallogr. D Biol. Crystallogr.* **66**, 213–221 (2010).
32. V. B. Chen, W. B. Arendall, 3rd, J. J. Headd, D. A. Keedy, R. M. Immormino, G. J. Kapral, L. W. Murray, J. S. Richardson, D. C. Richardson, MolProbity: All-atom structure validation for macromolecular crystallography. *Acta Crystallogr. D Biol. Crystallogr.* **66**, 12–21 (2010).



33. B. K. Ho, F. Gruswitz, HOLLOW: Generating accurate representations of channel and interior surfaces in molecular structures. *BMC Struct. Biol.* **8**, 49 (2008).
34. T. D. Goddard, C. C. Huang, E. C. Meng, E. F. Pettersen, G. S. Couch, J. H. Morris, T. E. Ferrin, UCSF ChimeraX: Meeting modern challenges in visualization and analysis. *Protein Sci.* **27**, 14–25 (2018).
35. E. F. Pettersen, T. D. Goddard, C. C. Huang, G. S. Couch, D. M. Greenblatt, E. C. Meng, T. E. Ferrin, UCSF Chimera—A visualization system for exploratory research and analysis. *J. Comput. Chem.* **25**, 1605–1612 (2004).
36. L. Schrödinger, W. DeLano, 2020. PyMOL; [www.pymol.org/pymol](http://www.pymol.org/pymol).
37. T. E. Spikes, M. G. Montgomery, J. E. Walker, Structure of the dimeric ATP synthase from bovine mitochondria. *Proc. Natl. Acad. Sci. U.S.A.* **117**, 23519–23526 (2020).
38. H. Guo, S. A. Bueler, J. L. Rubinstein, Atomic model for the dimeric F<sub>O</sub> region of mitochondrial ATP synthase. *Science* **358**, 936–940 (2017).
39. M. Sobti, J. L. Walshe, D. Wu, R. Ishmukhametov, Y. C. Zeng, C. V. Robinson, R. M. Berry, A. G. Stewart, Cryo-EM structures provide insight into how *E. coli* F<sub>1</sub>F<sub>o</sub> ATP synthase accommodates symmetry mismatch. *Nat. Commun.* **11**, 2615 (2020).
40. H. Ashkenazy, S. Abadi, E. Martz, O. Chay, I. Mayrose, T. Pupko, N. Ben-Tal, ConSurf 2016: An improved methodology to estimate and visualize evolutionary conservation in macromolecules. *Nucleic Acids Res.* **44**, W344-W350 (2016).
